# Supplementary material for: Global epidemiology of mucopolysaccharidosis type III (Sanfilippo syndrome): an updated systematic review and meta-analysis
Source: publisher site journal article supplement (doi:10.1515/jpem-2020-0742), 2021-07-16
Supplement: Supplementary file 2 [file j_jpem-2020-0742_suppl_002.docx]

**Detailed literature search strategy for EMBASE**

| No. | Query | Results | Date |
| --- | --- | --- | --- |
| #6 | #4 AND #5 | 697 | 29-Jun-20 |
| #5 | #1 OR #2 OR #3 | 3611169 | 29-Jun-20 |
| #4 | mucopolysaccharidoses | 8318 | 29-Jun-20 |
| #3 | prevalence | 1053044 | 29-Jun-20 |
| #2 | incidence | 1219282 | 29-Jun-20 |
| #1 | epidemiolog* | 2126288 | 29-Jun-20 |

**Detailed literature search strategy for MEDLINE**

| Search number | Query | Search Details | Results | Time |
| --- | --- | --- | --- | --- |
| 6 | (#5) AND (#4) | (("incidence"[MeSH Terms] OR "prevalence"[MeSH Terms]) OR "epidemiolog*"[MeSH Terms]) AND "mucopolysaccharidoses"[MeSH Terms] | 1,229 | 8:43:36 |
| 5 | ((#1) OR (#2)) OR (#3) | "incidence"[MeSH Terms] OR "prevalence"[MeSH Terms] OR "epidemiolog*"[MeSH Terms] | 6,767,477 | 8:43:15 |
| 4 | Mucopolysaccharidosis[mh] | "mucopolysaccharidoses"[MeSH Terms] | 6,409 | 8:42:51 |
| 3 | Epidemiolog*[mh] | "epidemiolog*"[MeSH Terms] | 6,765,264 | 8:42:19 |
| 2 | Prevalence[mh] | "prevalence"[MeSH Terms] | 290,385 | 8:42:00 |
| 1 | Incidence[mh] | "incidence"[MeSH Terms] | 261,200 | 8:41:47 |
