# Supplementary material for: Global epidemiology of mucopolysaccharidosis type III (Sanfilippo syndrome): an updated systematic review and meta-analysis
Source: publisher site journal article supplement (doi:10.1515/jpem-2020-0742), 2021-07-16
Supplement: Supplementary file 3 [file j_jpem-2020-0742_suppl_003.xlsx]

## Sheet: Sheet1
Adapted checklist for reporting items in observational studies of rare diseases (adapted from strobe checklist) – taken from Leady et al., 2014 (DOI: 10.1186/s13023-014-0173-x).		Schaap, 1980	Lowry, 1990	Nelson, 1997	Hutchesson, 1998	Poorthuis, 1999	Applegarth, 2000	Dionisi-Vici, 2002	Joshi, 2002	Nelson, 2003	Baehner, 2005	Malm, 2008	Ben Turkia, 2009	Lin, 2009	Moammar, 2010	Poupětová, 2010	Héron, 2011	Al-Maawali, 2012	Gómez, 2012	Krabbi 2012	Hult, 2014	Jurecka, 2014	Alfadhel, 2016	Khan, 2017	Chien, 2020	Federhen, 2020
1. Was there an adequate description of study design and setting?	method of data collection (e.g. retrospective epidemiological survey, records from a list of sources)	Yes	Yes	Yes	Yes	Yes	Yes	Yes	Yes	Yes	Yes	Yes	Yes	Yes	Yes	Yes	Yes	Yes	Yes	Yes	Yes	Yes	Yes	Yes	Yes	Yes
	setting (e.g. clinics, population registered at general practices, medical records database)	Yes	Yes	Yes	Yes	Yes	Yes	Yes	No	Yes	Yes	Yes	Yes	Yes	Yes	Yes	Yes	No	Yes	Yes	Yes	Yes	Yes	Yes	Yes	Yes
	relevant dates (periods for recruitment, data collection)	Yes	Yes	No	No	No	Yes	Yes	No	Yes	Yes	Yes	Yes		Yes	No	No	Yes	Yes	Yes	Yes	Yes	Yes	Yes	Yes	Yes
	source of denominator population for prevalence calculations (e.g. UK national statistics)	Yes	Yes	Yes	Yes	Yes	Yes	Yes	Yes	Yes	Yes	Yes	Yes	Yes	Yes	Yes	Yes	Yes	Yes	Yes	Yes	Yes	Yes	Yes	Yes	Yes
2. Was there an adequate description of eligibility criteria?	inclusion criteria (exclusion criteria are not necessary)	Yes	No	Yes	Yes	Yes	Yes	Yes	No	Yes	Yes	Yes	Yes	Yes	Yes	Yes	Yes	No	Yes	Yes	Yes	Yes	Yes	Yes	Yes	Yes
	type of MPS III they report (specifically MPS IIIA,IIIB, IIIC or IIID)	Yes	Yes	Yes	Yes	Yes	Yes	Yes	No	Yes	Yes	Yes	Yes	Yes	No	Yes	Yes	No	No	Yes	Yes	No	Yes	Yes	Yes	Yes
	diagnoses methods	Yes	No	Yes	No	Yes	Yes	Yes	Yes	Yes	Yes	Yes	Yes	Yes	Yes	Yes	Yes	Yes	No	Yes	Yes	Yes	Yes	Yes	Yes	Yes
3. Is the study population representative of the target population?	1、all necessary diagnostic centres 2、achieve full ascertainment 3、extensive list of sources	Yes	Yes	Yes	Yes	Yes	Yes	No	No	Yes	Yes	Yes	Yes	Yes	Yes	Yes	Yes	No	No	Yes	Yes	Yes	Yes	Yes	Yes	Yes
	all patients were included in the study	No	Yes	Yes	Yes	Yes	Yes	Yes	Yes	Yes	Yes	Yes	Yes	Yes	Yes	Yes	No	No	No	Yes	Yes	Yes	Yes	Yes	Yes	Yes
4. Is there an adequate description of outcomes?	patients in denominator	Yes	Yes	Yes	Yes	Yes	Yes	Yes	Yes	Yes	Yes	No	Yes	Yes	Yes	Yes	Yes	Yes	Yes	Yes	Yes	Yes	Yes	Yes	Yes	Yes
	patients in numerator	Yes	Yes	Yes	Yes	Yes	Yes	Yes	Yes	Yes	Yes	Yes	Yes	Yes	Yes	Yes	Yes	Yes	Yes	Yes	Yes	Yes	Yes	Yes	Yes	Yes
	time frame of study	Yes	Yes	Yes	Yes	Yes	Yes	Yes	Yes	Yes	Yes	Yes	Yes	Yes	Yes	Yes	Yes	Yes	Yes	Yes	Yes	Yes	Yes	Yes	Yes	Yes
	period of study	Yes	Yes	No	No	No	No	No	No	No	No	No	No	No	No	No	No	No	No	No	No	No	No	No	No	No
5. Is there an adequate description of the study participants?	more than just age (at diagnosis) and gender (for example ethnicity)	No	No	Yes	Yes	Yes	Yes	No	No	Yes	Yes	Yes	No	No	No	No	Yes	No	No	No	No	Yes	Yes	Yes	Yes	Yes
